# Supplementary material for: Phytochemical Screening and Multivariate Analysis on Physicochemical and Nutraceutical Value of Kocho from False Banana (Enset)
Source: Hindawi journal article supplement (doi:10.1155/2023/6666635), 2023-03-09
Supplement: f1 [file 6666635.f1.pdf]

**Data set Table:** The triplicate measurement of physicochemical and nutraceutical values of analyzed samples.

| S/n | Location | Var | strt | FT | Triplicate | Protein | Fat  | Fiber | Mc (db) | CHO    | Energy  | pH   | TA     | Ash  |
|-----|----------|-----|------|----|------------|---------|------|-------|---------|--------|---------|------|--------|------|
| 1   | L1       | V1  | S1   | F0 | 1          | 3.36    | 1.49 | 9.93  | 8.835   | 74.005 | 322.87  | 4.5  | 0.13   | 2.38 |
| 2   | L1       | V1  | S1   | F0 | 2          | 3.38    | 1.55 | 9.94  | 8.656   | 74.064 | 323.726 | 4.5  | 0.13   | 2.41 |
| 3   | L1       | V1  | S1   | F0 | 3          | 3.4     | 1.61 | 9.95  | 8.682   | 73.918 | 323.762 | 4.5  | 0.13   | 2.44 |
| 4   | L1       | V1  | S1   | F2 | 1          | 3.95    | 1.19 | 5.55  | 6.129   | 80.011 | 346.554 | 3.8  | 0.272  | 3.17 |
| 5   | L1       | V1  | S1   | F2 | 2          | 4.06    | 1.2  | 5.97  | 6.642   | 78.948 | 342.832 | 3.8  | 0.78   | 3.18 |
| 6   | L1       | V1  | S1   | F2 | 3          | 4.15    | 1.21 | 6.39  | 6.834   | 78.226 | 340.394 | 3.8  | 0.84   | 3.19 |
| 7   | L1       | V1  | S1   | F4 | 1          | 5.9     | 0.61 | 2.93  | 5.893   | 81.117 | 353.558 | 3    | 0.517  | 3.55 |
| 8   | L1       | V1  | S1   | F4 | 2          | 5.97    | 0.62 | 3.37  | 5.961   | 80.509 | 351.496 | 3    | 0.559  | 3.57 |
| 9   | L1       | V1  | S1   | F4 | 3          | 6.04    | 0.63 | 3.81  | 5.028   | 80.902 | 353.438 | 3    | 0.601  | 3.59 |
| 10  | L1       | V1  | S2   | F0 | 1          | 2.7     | 1.42 | 9.37  | 6.268   | 77.902 | 335.188 | 4.9  | 0.1129 | 2.34 |
| 11  | L1       | V1  | S2   | F0 | 2          | 3.32    | 1.57 | 9.53  | 6.352   | 76.878 | 334.922 | 4.9  | 0.1199 | 2.35 |
| 12  | L1       | V1  | S2   | F0 | 3          | 3.37    | 1.72 | 9.69  | 6.296   | 76.564 | 335.216 | 4.9  | 0.1269 | 2.36 |
| 13  | L1       | V1  | S2   | F2 | 1          | 3.63    | 1.31 | 6.18  | 5.834   | 80.266 | 347.374 | 4.2  | 0.256  | 2.78 |
| 14  | L1       | V1  | S2   | F2 | 2          | 3.7     | 1.32 | 6.28  | 5.627   | 80.273 | 347.772 | 4.21 | 0.271  | 2.8  |
| 15  | L1       | V1  | S2   | F2 | 3          | 3.77    | 1.33 | 6.36  | 5.931   | 79.789 | 346.206 | 4.22 | 0.286  | 2.82 |
| 16  | L1       | V1  | S2   | F4 | 1          | 4.87    | 0.67 | 4.04  | 4.726   | 82.374 | 355.006 | 3.44 | 0.402  | 3.32 |
| 17  | L1       | V1  | S2   | F4 | 2          | 5.15    | 0.68 | 4.11  | 4.528   | 82.202 | 355.528 | 3.54 | 0.408  | 3.33 |
| 18  | L1       | V1  | S2   | F4 | 3          | 5.43    | 0.69 | 4.18  | 4.83    | 81.53  | 354.05  | 3.64 | 0.414  | 3.34 |
| 19  | L1       | V2  | S1   | F0 | 1          | 3.04    | 1.24 | 7.67  | 7.228   | 78.762 | 338.368 | 5.3  | 0.121  | 2.06 |
| 20  | L1       | V2  | S1   | F0 | 2          | 3.14    | 1.26 | 7.84  | 7.351   | 78.339 | 337.256 | 5.4  | 0.124  | 2.07 |
| 21  | L1       | V2  | S1   | F0 | 3          | 3.24    | 1.28 | 8.01  | 7.392   | 77.998 | 336.472 | 5.5  | 0.127  | 2.08 |
| 22  | L1       | V2  | S1   | F2 | 1          | 3.32    | 0.59 | 5.53  | 5.94    | 81.49  | 344.55  | 3.9  | 0.26   | 3.13 |
| 23  | L1       | V2  | S1   | F2 | 2          | 3.46    | 0.62 | 5.78  | 5.826   | 81.174 | 344.116 | 3.9  | 0.27   | 3.14 |
| 24  | L1       | V2  | S1   | F2 | 3          | 3.6     | 0.65 | 6.03  | 5.859   | 80.711 | 343.094 | 3.9  | 0.28   | 3.15 |
| 25  | L1       | V2  | S1   | F4 | 1          | 5.39    | 0.28 | 2.21  | 4.862   | 83.938 | 359.832 | 3.2  | 0.447  | 3.32 |
| 26  | L1       | V2  | S1   | F4 | 2          | 5.41    | 0.31 | 2.22  | 4.381   | 84.349 | 361.826 | 3.2  | 0.562  | 3.33 |
| 27  | L1       | V2  | S1   | F4 | 3          | 5.43    | 0.34 | 2.23  | 4.793   | 83.867 | 360.248 | 3.2  | 0.677  | 3.34 |
| 28  | L1       | V2  | S2   | F0 | 1          | 3       | 1.07 | 7.06  | 5.262   | 81.568 | 347.902 | 6.5  | 0.104  | 2.04 |
| 29  | L1       | V2  | S2   | F0 | 2          | 3.09    | 1.09 | 7.08  | 5.688   | 80.982 | 346.098 | 6.5  | 0.113  | 2.07 |
| 30  | L1       | V2  | S2   | F0 | 3          | 3.18    | 1.11 | 7.1   | 5.372   | 81.138 | 347.262 | 6.5  | 0.122  | 2.1  |
| 31  | L1       | V2  | S2   | F2 | 1          | 3.18    | 0.96 | 6.43  | 4.238   | 82.432 | 351.088 | 4.3  | 0.23   | 2.76 |
| 32  | L1       | V2  | S2   | F2 | 2          | 3.35    | 1.08 | 7.35  | 4.319   | 81.121 | 347.604 | 4.31 | 0.24   | 2.78 |
| 33  | L1       | V2  | S2   | F2 | 3          | 3.52    | 1.2  | 8.27  | 4.397   | 79.813 | 344.132 | 4.32 | 0.25   | 2.8  |
| 34  | L1       | V2  | S2   | F4 | 1          | 4.8     | 0.49 | 3.46  | 2.985   | 85.045 | 363.79  | 3.6  | 0.34   | 3.22 |
| 35  | L1       | V2  | S2   | F4 | 2          | 4.92    | 0.51 | 3.48  | 2.824   | 85.036 | 364.414 | 3.6  | 0.34   | 3.23 |
| 36  | L1       | V2  | S2   | F4 | 3          | 5.04    | 0.53 | 3.5   | 2.625   | 85.065 | 365.19  | 3.6  | 0.34   | 3.24 |
| 37  | L2       | V1  | S1   | F0 | 1          | 3.84    | 1.69 | 11.63 | 9.165   | 71.225 | 315.47  | 4.14 | 0.08   | 2.45 |
| 38  | L2       | V1  | S1   | F0 | 2          | 4.01    | 1.69 | 11.63 | 9.537   | 70.673 | 313.942 | 4.15 | 0.08   | 2.46 |
| 39  | L2       | V1  | S1   | F0 | 3          | 4.18    | 1.69 | 11.63 | 9.317   | 70.713 | 314.782 | 4.16 | 0.08   | 2.47 |

**NOTE:**

Mc (db): Moisture content (dry basis)

CHO: Carbohydrates

TA: Titrable acidity

Location (place name):

L1 - Disa Kera

L2 - Koysa Gorta

Var (Variety of kocho sample):

V1 - Meazia

V2 - Katania

Strt. (Starter culture gamma):

S1 - with gamma

S2 - without gamma

FT (Fermentation time)

F0 - non-fermented kocho (initial)

F2 - 2 months fermented kocho

F4 - 4 months fermented kocho

|    |    |    |    |    |   |      |      |       |       |        |         |      |       |      |
|----|----|----|----|----|---|------|------|-------|-------|--------|---------|------|-------|------|
| 40 | L2 | V1 | S1 | F2 | 1 | 3.88 | 1.34 | 8.68  | 7.382 | 75.338 | 328.932 | 3.6  | 0.25  | 3.38 |
| 41 | L2 | V1 | S1 | F2 | 2 | 4.01 | 1.35 | 8.88  | 7.53  | 74.84  | 327.55  | 3.61 | 0.26  | 3.39 |
| 42 | L2 | V1 | S1 | F2 | 3 | 4.14 | 1.36 | 9.08  | 7.526 | 74.494 | 326.776 | 3.62 | 0.27  | 3.4  |
| 43 | L2 | V1 | S1 | F4 | 1 | 5.47 | 0.74 | 5.61  | 5.387 | 79.323 | 345.832 | 3.2  | 0.33  | 3.47 |
| 44 | L2 | V1 | S1 | F4 | 2 | 5.54 | 0.8  | 5.76  | 5.138 | 79.272 | 346.448 | 3.2  | 0.35  | 3.49 |
| 45 | L2 | V1 | S1 | F4 | 3 | 5.61 | 0.86 | 5.91  | 5.48  | 78.63  | 344.7   | 3.2  | 0.37  | 3.51 |
| 46 | L2 | V1 | S2 | F0 | 1 | 3.36 | 1.21 | 11.29 | 8.356 | 73.354 | 317.746 | 4.68 | 0.06  | 2.43 |
| 47 | L2 | V1 | S2 | F0 | 2 | 3.5  | 1.26 | 11.3  | 8.821 | 72.679 | 316.056 | 4.7  | 0.06  | 2.44 |
| 48 | L2 | V1 | S2 | F0 | 3 | 3.64 | 1.31 | 11.31 | 8.691 | 72.599 | 316.746 | 4.72 | 0.06  | 2.45 |
| 49 | L2 | V1 | S2 | F2 | 1 | 3.61 | 0.93 | 10.2  | 7.244 | 75.096 | 323.194 | 3.9  | 0.162 | 2.92 |
| 50 | L2 | V1 | S2 | F2 | 2 | 3.79 | 0.97 | 10.28 | 7.183 | 74.837 | 323.238 | 3.9  | 0.168 | 2.94 |
| 51 | L2 | V1 | S2 | F2 | 3 | 3.97 | 1.01 | 10.36 | 7.457 | 74.243 | 321.942 | 3.9  | 0.174 | 2.96 |
| 52 | L2 | V1 | S2 | F4 | 1 | 4.49 | 0.74 | 5.79  | 6.47  | 79.05  | 340.82  | 3.4  | 0.3   | 3.46 |
| 53 | L2 | V1 | S2 | F4 | 2 | 4.52 | 0.77 | 5.82  | 6.13  | 79.28  | 342.13  | 3.4  | 0.32  | 3.48 |
| 54 | L2 | V1 | S2 | F4 | 3 | 4.55 | 0.8  | 5.85  | 6.518 | 78.782 | 340.528 | 3.4  | 0.34  | 3.5  |
| 55 | L2 | V2 | S1 | F0 | 1 | 2.99 | 1.42 | 9.77  | 8.26  | 75.16  | 325.38  | 4.5  | 0.08  | 2.4  |
| 56 | L2 | V2 | S1 | F0 | 2 | 3.15 | 1.42 | 9.95  | 8.417 | 74.653 | 323.992 | 4.51 | 0.08  | 2.41 |
| 57 | L2 | V2 | S1 | F0 | 3 | 3.31 | 1.42 | 10.13 | 8.538 | 74.182 | 322.748 | 4.52 | 0.08  | 2.42 |
| 58 | L2 | V2 | S1 | F2 | 1 | 3.7  | 1.27 | 5.53  | 6.772 | 79.458 | 344.062 | 3.8  | 0.24  | 3.27 |
| 59 | L2 | V2 | S1 | F2 | 2 | 3.77 | 1.32 | 5.78  | 6.524 | 79.606 | 345.384 | 3.8  | 0.25  | 3    |
| 60 | L2 | V2 | S1 | F2 | 3 | 3.84 | 1.37 | 6.03  | 6.53  | 79.2   | 344.49  | 3.8  | 0.26  | 3.03 |
| 61 | L2 | V2 | S1 | F4 | 1 | 5.01 | 0.53 | 5.27  | 4.849 | 81.161 | 349.454 | 3.5  | 0.3   | 3.18 |
| 62 | L2 | V2 | S1 | F4 | 2 | 5.14 | 0.55 | 5.3   | 4.792 | 81.008 | 349.542 | 3.5  | 0.31  | 3.21 |
| 63 | L2 | V2 | S1 | F4 | 3 | 5.27 | 0.57 | 5.33  | 4.582 | 81.008 | 350.242 | 3.5  | 0.32  | 3.24 |
| 64 | L2 | V2 | S2 | F0 | 1 | 2.79 | 0.99 | 8.72  | 7.518 | 77.752 | 331.078 | 4.8  | 0.043 | 2.23 |
| 65 | L2 | V2 | S2 | F0 | 2 | 3.02 | 1.06 | 8.76  | 7.628 | 77.292 | 330.788 | 4.8  | 0.048 | 2.24 |
| 66 | L2 | V2 | S2 | F0 | 3 | 3.25 | 1.13 | 8.8   | 7.32  | 77.25  | 332.17  | 4.8  | 0.53  | 2.25 |
| 67 | L2 | V2 | S2 | F2 | 1 | 3.52 | 0.62 | 7.46  | 5.841 | 79.729 | 338.576 | 4    | 0.15  | 2.83 |
| 68 | L2 | V2 | S2 | F2 | 2 | 3.54 | 0.65 | 7.48  | 5.619 | 79.861 | 339.454 | 4    | 0.16  | 2.85 |
| 69 | L2 | V2 | S2 | F2 | 3 | 3.56 | 0.68 | 7.5   | 5.527 | 79.863 | 339.812 | 4    | 0.17  | 2.87 |
| 70 | L2 | V2 | S2 | F4 | 1 | 4.33 | 0.56 | 5.51  | 3.286 | 83.344 | 355.736 | 3.6  | 0.26  | 2.97 |
| 71 | L2 | V2 | S2 | F4 | 2 | 4.39 | 0.58 | 5.77  | 3.489 | 82.781 | 353.904 | 3.6  | 0.26  | 2.99 |
| 72 | L2 | V2 | S2 | F4 | 3 | 4.45 | 0.6  | 5.83  | 3.575 | 82.535 | 353.34  | 3.6  | 0.26  | 3.01 |
